# Supplementary material for: Metabolomics Characterization of Two Apocynaceae Plants, Catharanthus roseus and Vinca minor, Using GC-MS and LC-MS Methods in Combination
Source: PubMed Central journal article supplement (PMC6152753; doi:10.3390/molecules22060997), 2017-06-17
Supplement: molecules-22-00997-s001.pdf [file molecules-22-00997-s001.pdf]

## Supplementary Materials

**Table S1.** Pearson correlation matrix of trehalose and five physiological indicators in *C. roseus*.

|           | Trehalose | LL     | LW     | LA     | FW     |
|-----------|-----------|--------|--------|--------|--------|
| Trehalose | 1         | -0.441 | -0.527 | -0.032 | -0.134 |
| LL        |           | 1      | 0.832* | -0.651 | -0.027 |
| LW        |           |        | 1      | -0.718 | 0.152  |
| LA        |           |        |        | 1      | -0.469 |
| FW        |           |        |        |        | 1      |

LL, leaf length; LW, leaf width; LA, leaf area; FW, fresh weight; \* $p < 0.05$ ; \*\* $p < 0.01$ ; \*\*\* $p < 0.001$ .

**Table S2.** Pearson correlation matrix of trehalose and five physiological indicators in *V. minor*.

|           | Trehalose | LL    | LW     | LA      | FW     |
|-----------|-----------|-------|--------|---------|--------|
| Trehalose | 1         | -0.38 | -0.609 | -0.845* | -0.354 |
| LL        |           | 1     | 0.666  | 0.484   | -0.027 |
| LW        |           |       | 1      | 0.542   | 0.174  |
| LA        |           |       |        | 1       | -0.075 |
| FW        |           |       |        |         | 1      |

LL, leaf length; LW, leaf width; LA, leaf area; FW, fresh weight; \* $p < 0.05$ ; \*\* $p < 0.01$ ; \*\*\* $p < 0.001$ .

**Table S3.** Pearson correlation matrix of digalacturonic acid and two physiological indicators in *C. roseus*.

|                     | Digalacturonic Acid | LA   | LT    |
|---------------------|---------------------|------|-------|
| Digalacturonic Acid | 1                   | 0.34 | 0.244 |
| LA                  |                     | 1    | 0.294 |
| LT                  |                     |      | 1     |

LA, leaf area; LT, leaf thickness; \* $p < 0.05$ ; \*\* $p < 0.01$ ; \*\*\* $p < 0.001$ .

**Table S4.** Pearson correlation matrix of gallic acid and three physiological indicators in *C. roseus*.

|             | Gallic Acid | LW    | LT     | LMA    |
|-------------|-------------|-------|--------|--------|
| Gallic Acid | 1           | 0.298 | 0.169  | 0.673  |
| LW          |             | 1     | -0.555 | 0.588  |
| LT          |             |       | 1      | -0.283 |
| LMA         |             |       |        | 1      |

LW, leaf width; LT, leaf thickness; LMA, leaf mass per unit area; \* $p < 0.05$ ; \*\* $p < 0.01$ ; \*\*\* $p < 0.001$ .

**Table S5.** Pearson correlation matrix of tree metabolites and leaf thickness in *V. minor*.

|                     | LT | Cellobiose | Digalacturonic Acid | Gallic Acid |
|---------------------|----|------------|---------------------|-------------|
| LT                  | 1  | 0.059      | 0.498               | 0.743       |
| Cellobiose          |    | 1          | -0.219              | 0.247       |
| Digalacturonic acid |    |            | 1                   | 0.726       |
| Gallic acid         |    |            |                     | 1           |

LT, leaf thickness; \* $p < 0.05$ ; \*\* $p < 0.01$ ; \*\*\* $p < 0.001$ .

**Table S6** Pearson correlation matrix of raffinose and tree physiological indicators in *V. minor*.

|           | Raffinose | RWC    | Tr     | LT     |
|-----------|-----------|--------|--------|--------|
| Raffinose | 1         | -0.025 | -0.479 | 0.725  |
| RWC       |           | 1      | 0.524  | -0.253 |
| Tr        |           |        | 1      | -0.643 |
| LT        |           |        |        | 1      |

RWC, relative water content; Transpiration rate, Tr; LT, leaf thickness; \*p < 0.05; \*\*p < 0.01; \*\*\*p < 0.001.

**Table S7.** The content of TIAs in the leaf of *C. roseus* and *V. minor*.

| TIA           | <i>C. roseus</i> (mg g <sup>-1</sup> ) | <i>V. minor</i> (mg g <sup>-1</sup> ) |
|---------------|----------------------------------------|---------------------------------------|
| Loganin       | 0.043 ± 0.01                           | 0.756 ± 0.11                          |
| Tryptamine    | 0.007 ± 0.0004                         | 0.002 ± 8 × 10 <sup>-5</sup>          |
| Tabersonine   | 0.001 ± 0.0002                         | 0.003 ± 0.0001                        |
| Serpenitine   | 0.008 ± 0.0015                         | 0.044 ± 0.005                         |
| Catharanthine | 0.0004 ± 0.0002                        | --                                    |
| Vindoline     | 0.051 ± 0.01                           | --                                    |
| Vinblastine   | 0.093 ± 0.007                          | --                                    |
| Vincristine   | 0.067 ± 0.016                          | --                                    |
| Vinacmine     | --                                     | 0.173 ± 0.04                          |

The calculation of FDR was based on the following formula: p-value(i) = p(i)\* length(p)/rank(p).

**Table S8.** The FDR result of different metabolites between *C. roseus* and *V. minor*.

| Metabolites             | FDR                        |
|-------------------------|----------------------------|
| Glycolic acid           | 7.97143 × 10 <sup>-7</sup> |
| Pyruvic acid            | 1.0603 × 10 <sup>-5</sup>  |
| Galactinol              | 0.0002                     |
| 2-Hydroxypyridine       | 0.0002                     |
| Loganin                 | 0.0004                     |
| L-Allothreonine         | 0.0008                     |
| Aspartic acid           | 0.0008                     |
| Chlorogenic Acid        | 0.001                      |
| Ribose                  | 0.001                      |
| Threonine               | 0.002                      |
| Aminoxyacetic acid      | 0.003                      |
| 3,6-Anhydro-D-galactose | 0.003                      |
| α-Ketoglutaric acid     | 0.005                      |
| Ornithine               | 0.005                      |
| Phosphate               | 0.008                      |
| Valine                  | 0.012                      |
| Glutamic acid           | 0.012                      |
| Tagatose                | 0.012                      |
| 4-Hydroxymandelonitrile | 0.012                      |
| Fumaric acid            | 0.012                      |
| Dodecanol               | 0.011                      |
| Quinic acid             | 0.011                      |
| Mannitol                | 0.011                      |
| Fructose                | 0.012                      |
| 3-Aminoisobutyric acid  | 0.012                      |
| myo-Inositol            | 0.012                      |

|                               |       |
|-------------------------------|-------|
| Lyxose                        | 0.013 |
| Erythrose                     | 0.013 |
| Levogluconan                  | 0.014 |
| Gluconic lactone              | 0.016 |
| 1,5-Anhydroglucitol           | 0.02  |
| Glucoheptonic acid            | 0.019 |
| Naringin                      | 0.019 |
| 2-Aminoethanethiol            | 0.019 |
| D-Talose                      | 0.02  |
| D-Glyceric acid               | 0.02  |
| Tyrosine                      | 0.02  |
| Gluconic acid                 | 0.02  |
| Threonic acid                 | 0.02  |
| Phytol                        | 0.02  |
| Lactitol                      | 0.02  |
| Maleic acid                   | 0.02  |
| Salicin                       | 0.03  |
| 2-Amino-1-phenylethanol       | 0.03  |
| Gallic acid                   | 0.03  |
| Glucose                       | 0.03  |
| Itaconic acid                 | 0.03  |
| Serine                        | 0.03  |
| Digalacturonic acid           | 0.03  |
| Tartaric acid                 | 0.03  |
| Glutamine                     | 0.03  |
| Threitol                      | 0.03  |
| Trehalose                     | 0.04  |
| 3-Methylamino-1,2-propanediol | 0.03  |
| Galactonic acid               | 0.046 |
| Oxoproline                    | --    |
| Vanillylmandelic acid         | --    |
| N-Acetyl-L-glutamic acid      | --    |
| 4-Hydroxybutyrate             | --    |
| Cellobiose                    | --    |
| Raffinose                     | --    |
| Octanal                       | --    |
| Norleucine                    | --    |
| Galactose                     | --    |

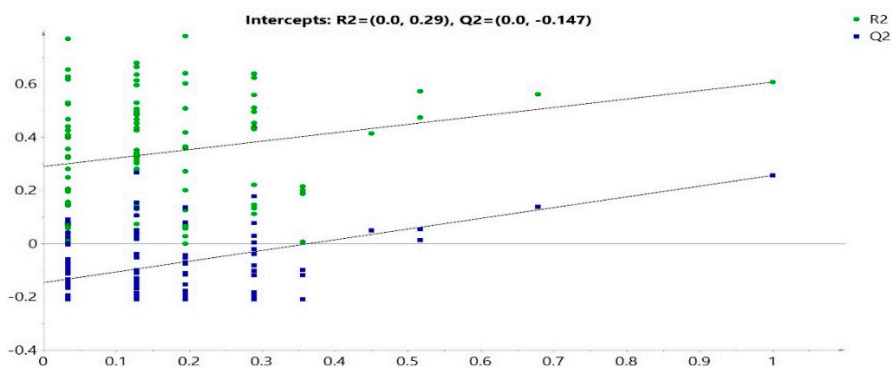

Figure S1 Validate Model of PLS-DA score plot between *Catharanthus roseus* and *Vinca minor*.

**Table S9.** The CV-ANOVA of PLS-DA.

| PLS-DA      | SS       | DF | MS       | F       | p                     | SD       |
|-------------|----------|----|----------|---------|-----------------------|----------|
| Total corr. | 11       | 11 | 1        |         |                       | 1        |
| Regression  | 10.6764  | 4  | 2.6691   | 57.7405 | $1.92 \times 10^{-5}$ | 1.63374  |
| Residual    | 0.323581 | 7  | 0.046226 |         |                       | 0.215002 |

SS, sum of square, DF, degree of freedom, MS, Mean of square, f-statistics, P,P-value, SD, mean square error.

**Table S10.** P-values of metabolites between *C. roseus* and *V. minor*.

| Peak                | Change Fold<br>( <i>V. minor</i> /<br><i>C. roseus</i> ) | F-Test                 | T-Test<br>Equal<br>Variance | T-Test<br>Heteroscedasticity | P-Value               |
|---------------------|----------------------------------------------------------|------------------------|-----------------------------|------------------------------|-----------------------|
| Valine              | 0.375072                                                 | 0.115696               | 0.002997                    | 0.005882                     | 0.002997              |
| Tyrosine            | 0.60188                                                  | 0.032613               | 0.005474                    | 0.011989                     | 0.011989              |
| Threonine           | 3.504796                                                 | 0.171639               | 0.000404                    | 0.001024                     | 0.000404              |
| Threonic acid       | 9.250436                                                 | $1.18 \times 10^{-6}$  | 0.004328                    | 0.014382                     | 0.014382              |
| Tartaric acid       | 2.405982                                                 | 0.001024               | 0.009759                    | 0.022807                     | 0.022807              |
| Tagatose            | 0.070212                                                 | 0.000201               | 0.000436                    | 0.003375                     | 0.003375              |
| Serine              | 38.14592                                                 | $3.33 \times 10^{-7}$  | 0.008391                    | 0.022067                     | 0.022067              |
| Saccharic acid      | 3.322235                                                 | $1.36 \times 10^{-5}$  | 0.025967                    | 0.047175                     | 0.047175              |
| Quinic acid         | 2.766339                                                 | 0.141575               | 0.003915                    | 0.006904                     | 0.003915              |
| Proline             | 0.587889                                                 | 0.015704               | 0.347234                    | 0.363233                     | 0.363233              |
| Phosphate           | 0.288326                                                 | 0.000398               | 0.00018                     | 0.001962                     | 0.001962              |
| Oxalic acid         | 0.996282                                                 | 0.370714               | 0.982956                    | 0.983024                     | 0.982956              |
| Ornithine           | 0.599397                                                 | 0.950994               | 0.001058                    | 0.00106                      | 0.001058              |
| Nicotinoylglycine   | 0.836692                                                 | 0.127196               | 0.136525                    | 0.148644                     | 0.136525              |
| myo-Inositol        | 0.160401                                                 | 0.020035               | 0.001307                    | 0.004677                     | 0.004677              |
| Monophthalate       | 1.176763                                                 | 0.98026                | 0.215181                    | 0.215185                     | 0.215181              |
| Methyl phosphate    | 0.855084                                                 | 0.803597               | 0.221122                    | 0.221507                     | 0.221122              |
| Methoxamedrine      | 1.332328                                                 | 0.472711               | 0.057474                    | 0.060356                     | 0.057474              |
| Mannitol            | 0.134895                                                 | 0.019075               | 0.001059                    | 0.004086                     | 0.004086              |
| Maleic acid         | 0.492775                                                 | 0.070903               | 0.01736                     | 0.026358                     | 0.01736               |
| Lyxose              | 2.383039                                                 | 0.166572               | 0.005404                    | 0.00863                      | 0.005404              |
| Loganin             | 12.1263                                                  | 0.001066               | $1.36 \times 10^{-7}$       | $3.37 \times 10^{-5}$        | $3.37 \times 10^{-5}$ |
| L-Malic acid        | 0.943323                                                 | 0.890616               | 0.708529                    | 0.708562                     | 0.708529              |
| Lactitol            | 2.776218                                                 | 0.001441               | 0.006073                    | 0.016375                     | 0.016375              |
| Lactic acid         | 0.889478                                                 | 0.198464               | 0.412545                    | 0.418461                     | 0.412545              |
| Kyotorphin          | 0.984454                                                 | 0.99196                | 0.898954                    | 0.898954                     | 0.898954              |
| Itaconic acid       | 4.161146                                                 | 0.258221               | 0.020405                    | 0.024892                     | 0.020405              |
| Glycerol            | 0.756464                                                 | 0.003352               | 0.347434                    | 0.366145                     | 0.366145              |
| Glutamic acid       | 0.18961                                                  | 0.000982               | 0.000441                    | 0.003179                     | 0.003179              |
| Glucose-1-phosphate | 22.92819                                                 | $2.55 \times 10^{-10}$ | 0.098665                    | 0.128288                     | 0.128288              |

**Table S10.** P-values

| Glucose             | 0.292022 | 0.00542               | 0.009101              | 0.02032  | 0.02032               |
|---------------------|----------|-----------------------|-----------------------|----------|-----------------------|
| Gluconic acid       | 3.971332 | $6.68 \times 10^{-5}$ | 0.003719              | 0.012756 | 0.012756              |
| Gallic acid         | 2.655112 | 0.969221              | 0.018595              | 0.018601 | 0.018595              |
| Galactonic acid     | 12.21658 | $5.87 \times 10^{-6}$ | 0.020251              | 0.039734 | 0.039734              |
| Galactinol          | 0.166298 | 0.071481              | $9.68 \times 10^{-6}$ | 0.000107 | $9.68 \times 10^{-6}$ |
| Fumaric acid        | 0.188414 | 0.000858              | 0.000594              | 0.003834 | 0.003834              |
| Fructose            | 0.052961 | $4.19 \times 10^{-5}$ | 0.000639              | 0.004378 | 0.004378              |
| Ethanolamine        | 1.30358  | 0.436874              | 0.073022              | 0.076575 | 0.073022              |
| Erythrose           | 0.492896 | 0.074069              | 0.005854              | 0.01104  | 0.005854              |
| D-Talose            | 0.042032 | $3.2 \times 10^{-6}$  | 0.002917              | 0.011197 | 0.011197              |
| Digalacturonic acid | 19.0092  | $1.43 \times 10^{-9}$ | 0.00866               | 0.022586 | 0.022586              |

|                                             |          |                        |                       |                       |                       |
|---------------------------------------------|----------|------------------------|-----------------------|-----------------------|-----------------------|
| D-Glyceric acid                             | 2.43669  | 0.010589               | 0.004413              | 0.011686              | 0.011686              |
| D-Erythrosphingosine                        | 1.10768  | 0.523602               | 0.872883              | 0.873159              | 0.872883              |
| Creatine degr.                              | 0.832335 | 0.125484               | 0.68469               | 0.688164              | 0.68469               |
| Chlorogenic acid                            | 0.222861 | 0.590343               | 0.000152              | 0.000193              | 0.000152              |
| Cellobiotol                                 | 0.830813 | 0.032575               | 0.426183              | 0.437943              | 0.437943              |
| $\beta$ -Mannosylglycerate                  | 0.79278  | 0.022095               | 0.664065              | 0.670369              | 0.670369              |
| Aspartic acid                               | 0.202807 | 0.033945               | $3.78 \times 10^{-6}$ | $8.65 \times 10^{-5}$ | $8.65 \times 10^{-5}$ |
| Aminooxyacetic acid                         | 1.963728 | 0.784327               | 0.000439              | 0.000462              | 0.000439              |
| Alanine                                     | 0.451731 | 0.294491               | 0.028969              | 0.033532              | 0.028969              |
| 4-Androsten-11 $\beta$ -ol-3,17-dione       | 0.910629 | 0.093431               | 0.417119              | 0.425925              | 0.417119              |
| 4-Aminobutyric acid                         | 1.064839 | 0.082951               | 0.738843              | 0.742185              | 0.738843              |
| 3-Aminoisobutyric acid                      | 11.43573 | $1.66 \times 10^{-6}$  | 0.000673              | 0.004636              | 0.004636              |
| 3,6-Anhydro-D-galactose                     | 0.325319 | 0.077758               | 0.000482              | 0.001652              | 0.000482              |
| 2-Aminoethanethiol                          | 0.48208  | 0.043886               | 0.00471               | 0.010256              | 0.010256              |
| 2-Amino-1-henylethanol                      | 0.349126 | 0.004492               | 0.007827              | 0.018483              | 0.018483              |
| 2,3-Dihydroxybenzoic acid                   | 2.070183 | 0.001019               | 0.091386              | 0.117994              | 0.117994              |
| Salicin                                     | 5.258054 | 0.014679               | 0.00834               | 0.017801              | 0.017801              |
| Pyruvic acid                                | 0.094812 | 0.10636                | $3.31 \times 10^{-7}$ | $7.25 \times 10^{-6}$ | $3.31 \times 10^{-7}$ |
| Isopropyl- $\beta$ -D-thiogalactopyranoside | 0.580475 | 0.769039               | 0.165654              | 0.166222              | 0.165654              |
| Isoleucine                                  | 3.455346 | 0.004353               | 0.069392              | 0.092842              | 0.092842              |
| Glutaconic acid                             | 0.041918 | $7.51 \times 10^{-9}$  | 0.331859              | 0.354583              | 0.354583              |
| Dodecanol                                   | 0.463981 | 0.878177               | 0.003877              | 0.003912              | 0.003877              |
| Caffeic acid                                | 0.558169 | 0.002354               | 0.086198              | 0.111531              | 0.111531              |
| 4-Hydroxymandelonitrile                     | 4.873474 | 0.014825               | 0.000864              | 0.003713              | 0.003713              |
| Trehalose                                   | 77.64279 | $1.16 \times 10^{-8}$  | 0.012769              | 0.029204              | 0.029204              |
| Spermidine                                  | 0.425786 | 0.531741               | 0.044842              | 0.046891              | 0.044842              |
| Ribose                                      | 0.133108 | 0.050685               | 0.000196              | 0.00101               | 0.000196              |
| Naringin                                    | 0.350139 | 0.569729               | 0.009802              | 0.010638              | 0.009802              |
| 5-methoxytryptamine                         | 1.188753 | 0.012578               | 0.584299              | 0.593242              | 0.593242              |
| Xylitol                                     | 0.695128 | 0.52482                | 0.542977              | 0.544157              | 0.542977              |
| Threitol                                    | 7.917954 | 0.00524                | 0.011967              | 0.024701              | 0.024701              |
| Methyl-beta-D-galactopyranoside             | 2.521722 | 0.006724               | 0.274831              | 0.295185              | 0.295185              |
| Levoglucofan                                | 11.66117 | 0.003168               | 0.001501              | 0.0063                | 0.0063                |
| Fucose                                      | 0.672963 | 0.939881               | 0.315273              | 0.315304              | 0.315273              |
| Citramalic acid                             | 1.226498 | 0.744367               | 0.625368              | 0.625617              | 0.625368              |
| 2-hydroxypyridine                           | 0.11099  | 0.170244               | $1.43 \times 10^{-5}$ | $7.45 \times 10^{-5}$ | $1.43 \times 10^{-5}$ |
| 2,3-dimethylsuccinic acid                   | 0.467706 | 0.077846               | 0.207718              | 0.221826              | 0.207718              |
| Glutamine                                   | 0.013499 | $6.38 \times 10^{-7}$  | 0.009773              | 0.024374              | 0.024374              |
| Digitoxose                                  | 1.045652 | 0.712406               | 0.936379              | 0.936426              | 0.936379              |
| Succinic acid                               | 3.174374 | 0.046992               | 0.068619              | 0.084933              | 0.084933              |
| Lysine                                      | 0.368187 | 0.067612               | 0.142529              | 0.158186              | 0.142529              |
| L-allothreonine                             | 0.010395 | 0.000251               | $5.17 \times 10^{-7}$ | $7.99 \times 10^{-5}$ | $7.99 \times 10^{-5}$ |
| Glycolic acid                               | 0.048918 | 0.282002               | $1.25 \times 10^{-8}$ | $1.35 \times 10^{-7}$ | $1.25 \times 10^{-8}$ |
| Gluconic lactone                            | 0.160577 | 0.686052               | 0.007613              | 0.007981              | 0.007613              |
| Glucoheptonic acid                          | 130715.3 | $3.19 \times 10^{-22}$ | 0.002238              | 0.009603              | 0.009603              |
| $\alpha$ -Ketoglutaric acid                 | 0.015797 | 0.00017                | 4.56E-05              | 0.000931              | 0.000931              |
| 4-Hydroxyquinazoline                        | 0.498172 | 0.590227               | 0.237791              | 0.239508              | 0.237791              |
| 1,5-Anhydroglucitol                         | 198.2445 | $4.11 \times 10^{-8}$  | 0.002216              | 0.009528              | 0.009528              |
| Vanillylmandelic acid                       | --       | --                     | 0.000194              | 0.00229               | --                    |
| Raffinose                                   | --       | --                     | 0.011874              | 0.027836              | --                    |
| Phytol                                      | 0.057049 | 0.004321               | 0.005861              | 0.015181              | 0.015181              |
| Oxoproline                                  | 0        | --                     | $6.42 \times 10^{-8}$ | $3.25 \times 10^{-5}$ | --                    |
| Maleamate                                   | 6.684093 | 0.034226               | 0.09586               | 0.114428              | 0.114428              |
| 3-Methylamino-1,2-propanediol               | 0.062704 | 0.003072               | 0.01476               | 0.029353              | 0.029353              |
| Phenyl $\beta$ -D-glucopyranoside           | --       | --                     | 0.056775              | 0.083925              | --                    |
| Octanal                                     | --       | --                     | 0.015752              | 0.033673              | --                    |
| N-acetyl-L-glutamic acid                    | 0        | --                     | 0.001731              | 0.008213              | --                    |
| Isocitric acid                              | 0        | --                     | 0.026588              | 0.048373              | --                    |

|                         |          |                       |          |          |          |
|-------------------------|----------|-----------------------|----------|----------|----------|
| Glycoamine              | 4.339811 | 0.012596              | 0.195567 | 0.216914 | 0.216914 |
| Cellobiose              | --       | --                    | 0.009337 | 0.023737 | --       |
| 6-Methylmercaptapurine  | 1.545968 | 0.816308              | 0.577346 | 0.577494 | 0.577346 |
| 4-Hydroxybutyrate       | --       | --                    | 0.002026 | 0.009035 | --       |
| 3-Hydroxypropionic acid | 1.425287 | 0.109492              | 0.701794 | 0.705267 | 0.701794 |
| 1-Hydroxyanthraquinone  | 1.922166 | 0.53409               | 0.411057 | 0.412657 | 0.411057 |
| Phytosphingosine        | 200.3828 | $1.07 \times 10^{-9}$ | 0.07473  | 0.103355 | 0.103355 |
| Norleucine              | 0        | --                    | 0.016703 | 0.035044 | --       |
| Methionine              | 2.874531 | 0.47303               | 0.302624 | 0.30528  | 0.302624 |
| Maltotriose             | --       | --                    | 0.022353 | 0.042836 | --       |
| L-Dopa                  | --       | --                    | 0.028393 | 0.050671 | --       |
| Glucose-6-phosphate     | 0.079847 | 0.000964              | 0.103309 | 0.130271 | 0.130271 |
| Gentiobiose             | --       | --                    | 0.040014 | 0.064823 | --       |
| Galactose               | 0        | --                    | 0.024115 | 0.045167 | --       |
| 4-Methylbenzyl alcohol  | 3.233402 | 0.376505              | 0.248543 | 0.252847 | 0.248543 |
| Sorbitol                | --       | --                    | 0.068307 | 0.096502 | --       |

---
